# Supplementary material for: CRISPR screens unveil nutrient-dependent lysosomal and mitochondrial nodes impacting intestinal tissue-resident memory CD8+ T cell formation
Source: PubMed Central journal article supplement — Immunity. Author manuscript; Available in PMC 2024 Nov 26. (PMC11590283; doi:10.1016/j.immuni.2024.09.013), 2024-10-14
Supplement: NIHMS2025347-supplement-MMC1.pdf [file NIHMS2025347-supplement-MMC1.pdf]

Immunity, Volume 57

## Supplemental information

### **CRISPR screens unveil nutrient-dependent lysosomal and mitochondrial nodes impacting intestinal tissue-resident memory CD8<sup>+</sup> T cell formation**

**Jana L. Raynor, Nicholas Collins, Hao Shi, Cliff Guy, Jordy Saravia, Seon Ah Lim, Nicole M. Chapman, Peipei Zhou, Yan Wang, Yu Sun, Isabel Risch, Haoran Hu, Anil KC, Renqiang Sun, Sharad Shrestha, Hongling Huang, Jon P. Connelly, Shondra M. Pruett-Miller, Miguel Reina-Campos, Ananda W. Goldrath, Yasmine Belkaid, and Hongbo Chi**

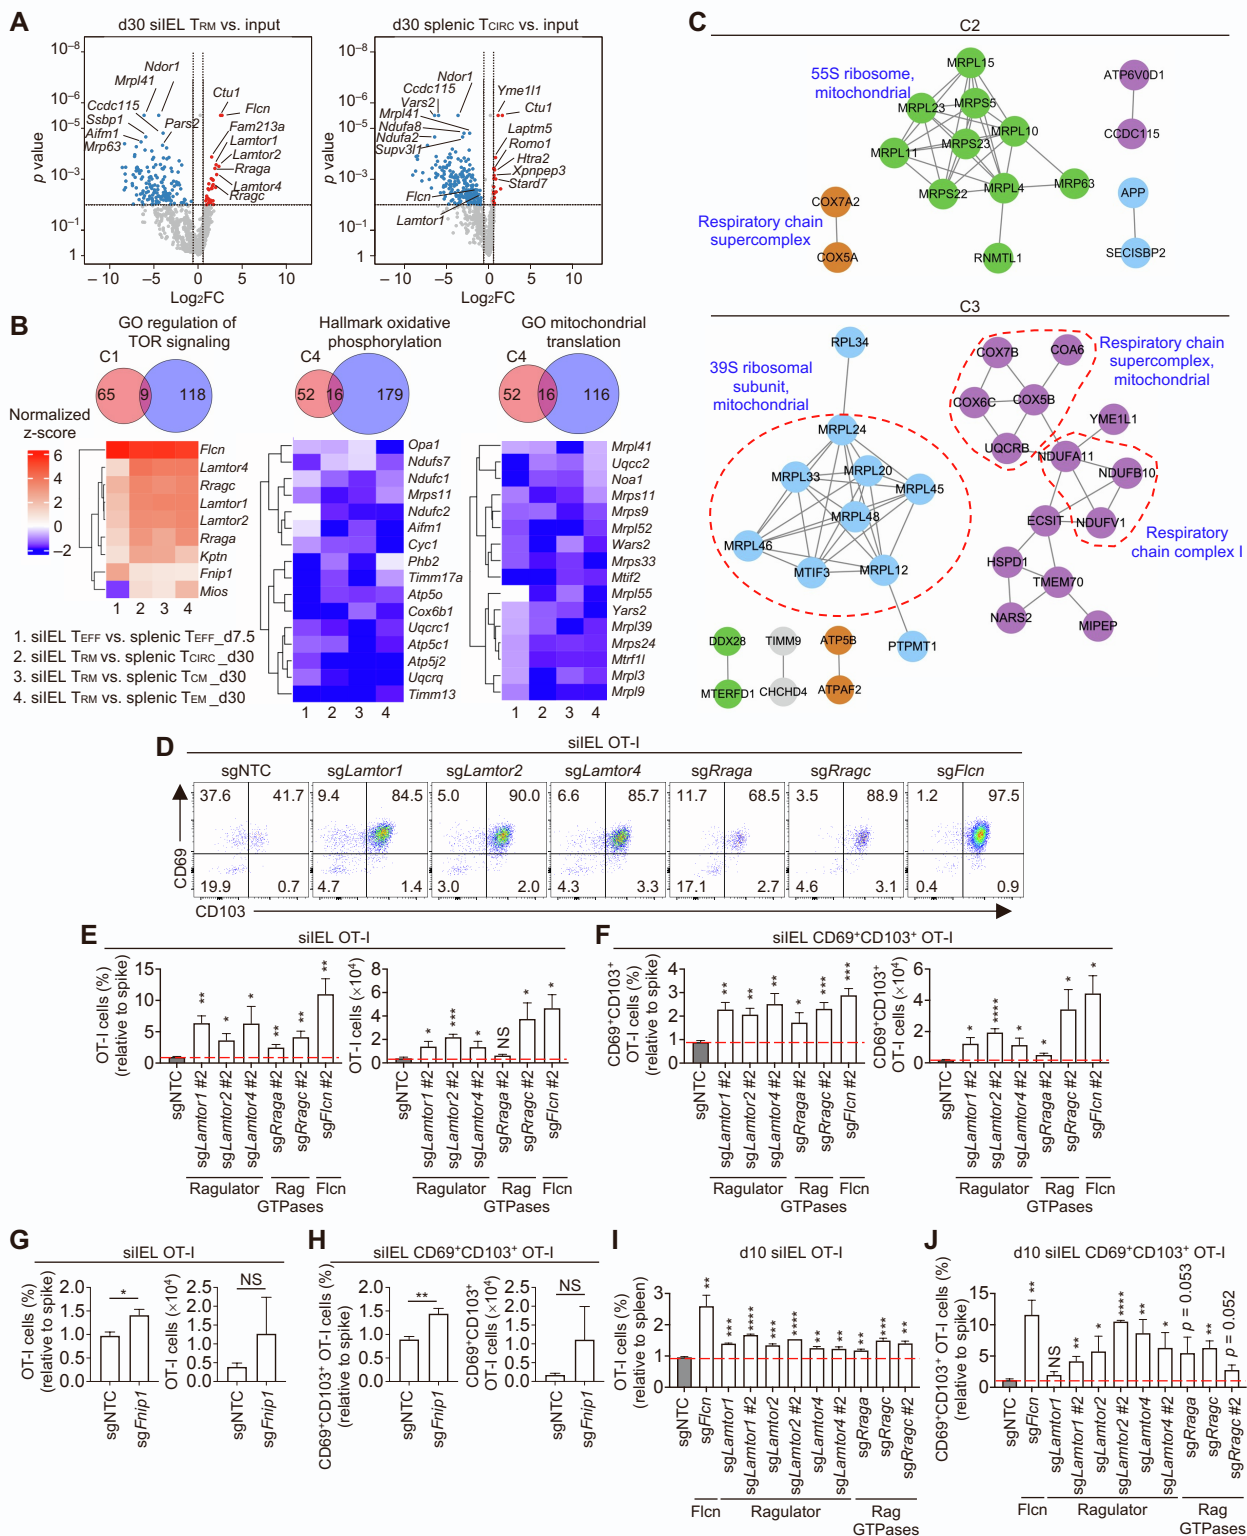

**Figure S1. Protein-protein interaction analysis and validation of lysosome-associated genes as negative regulators of CD8<sup>+</sup> T<sub>RM</sub> development (related to Figure 1).** (A) Volcano plots depicting genes targeted by sgRNAs that were enriched (denoted in red) or depleted (denoted in blue) in day 30 p.i. siEL T<sub>RM</sub> versus input cells or day 30 p.i. splenic T<sub>CIRC</sub> versus input cells from *in vivo* CRISPR screen (as described in Figure 1A). (B) Venn diagrams and heatmaps showing the genes in the GO regulation of TOR signaling signature that overlapped with C1 genes, or genes in the Hallmark oxidative phosphorylation signature and GOBP mitochondrial translation signature that overlapped with C4 genes (C1 and C4 genes identified as described in Figure 1B). (C) PPI networks of C2 and C3 genes (genes identified as described in Figure 1B). The red dotted lines indicate known protein complexes that are labeled by blue colored text. (D) CD103 and CD69 expression on siEL OT-I cells transduced with the indicated sgRNAs. (E and F) Frequencies (relative to spike) and numbers of indicated sgRNA-transduced total (E) or CD69<sup>+</sup>CD103<sup>+</sup> (F) OT-I cells in siEL at day 21 p.i. (from dual-color transfer system) ( $n \geq 3$  per group). (G and H) Frequencies (relative to spike) and numbers of indicated sgRNA-transduced total (G) or CD69<sup>+</sup>CD103<sup>+</sup> (H) OT-I cells in siEL at day 21 p.i. (from dual-color transfer system) ( $n \geq 4$  per group). (I and J) Frequencies (normalized to sgNTC spike first and then to the relative frequency among splenic OT-I cells) of total (I) or CD69<sup>+</sup>CD103<sup>+</sup> (J) siEL OT-I cells at day 10 p.i. (from dual-color transfer system) ( $n \geq 2$  per group). Two-tailed unpaired Student's t test (E–J). NS, not significant; \* $p < 0.05$ , \*\* $p < 0.01$ , \*\*\* $p < 0.001$ , \*\*\*\* $p < 0.0001$ . Data (mean  $\pm$  SEM) are compiled from two (E, F, I, and J) or represent  $\geq 1$  (D, G, and H) experiments.

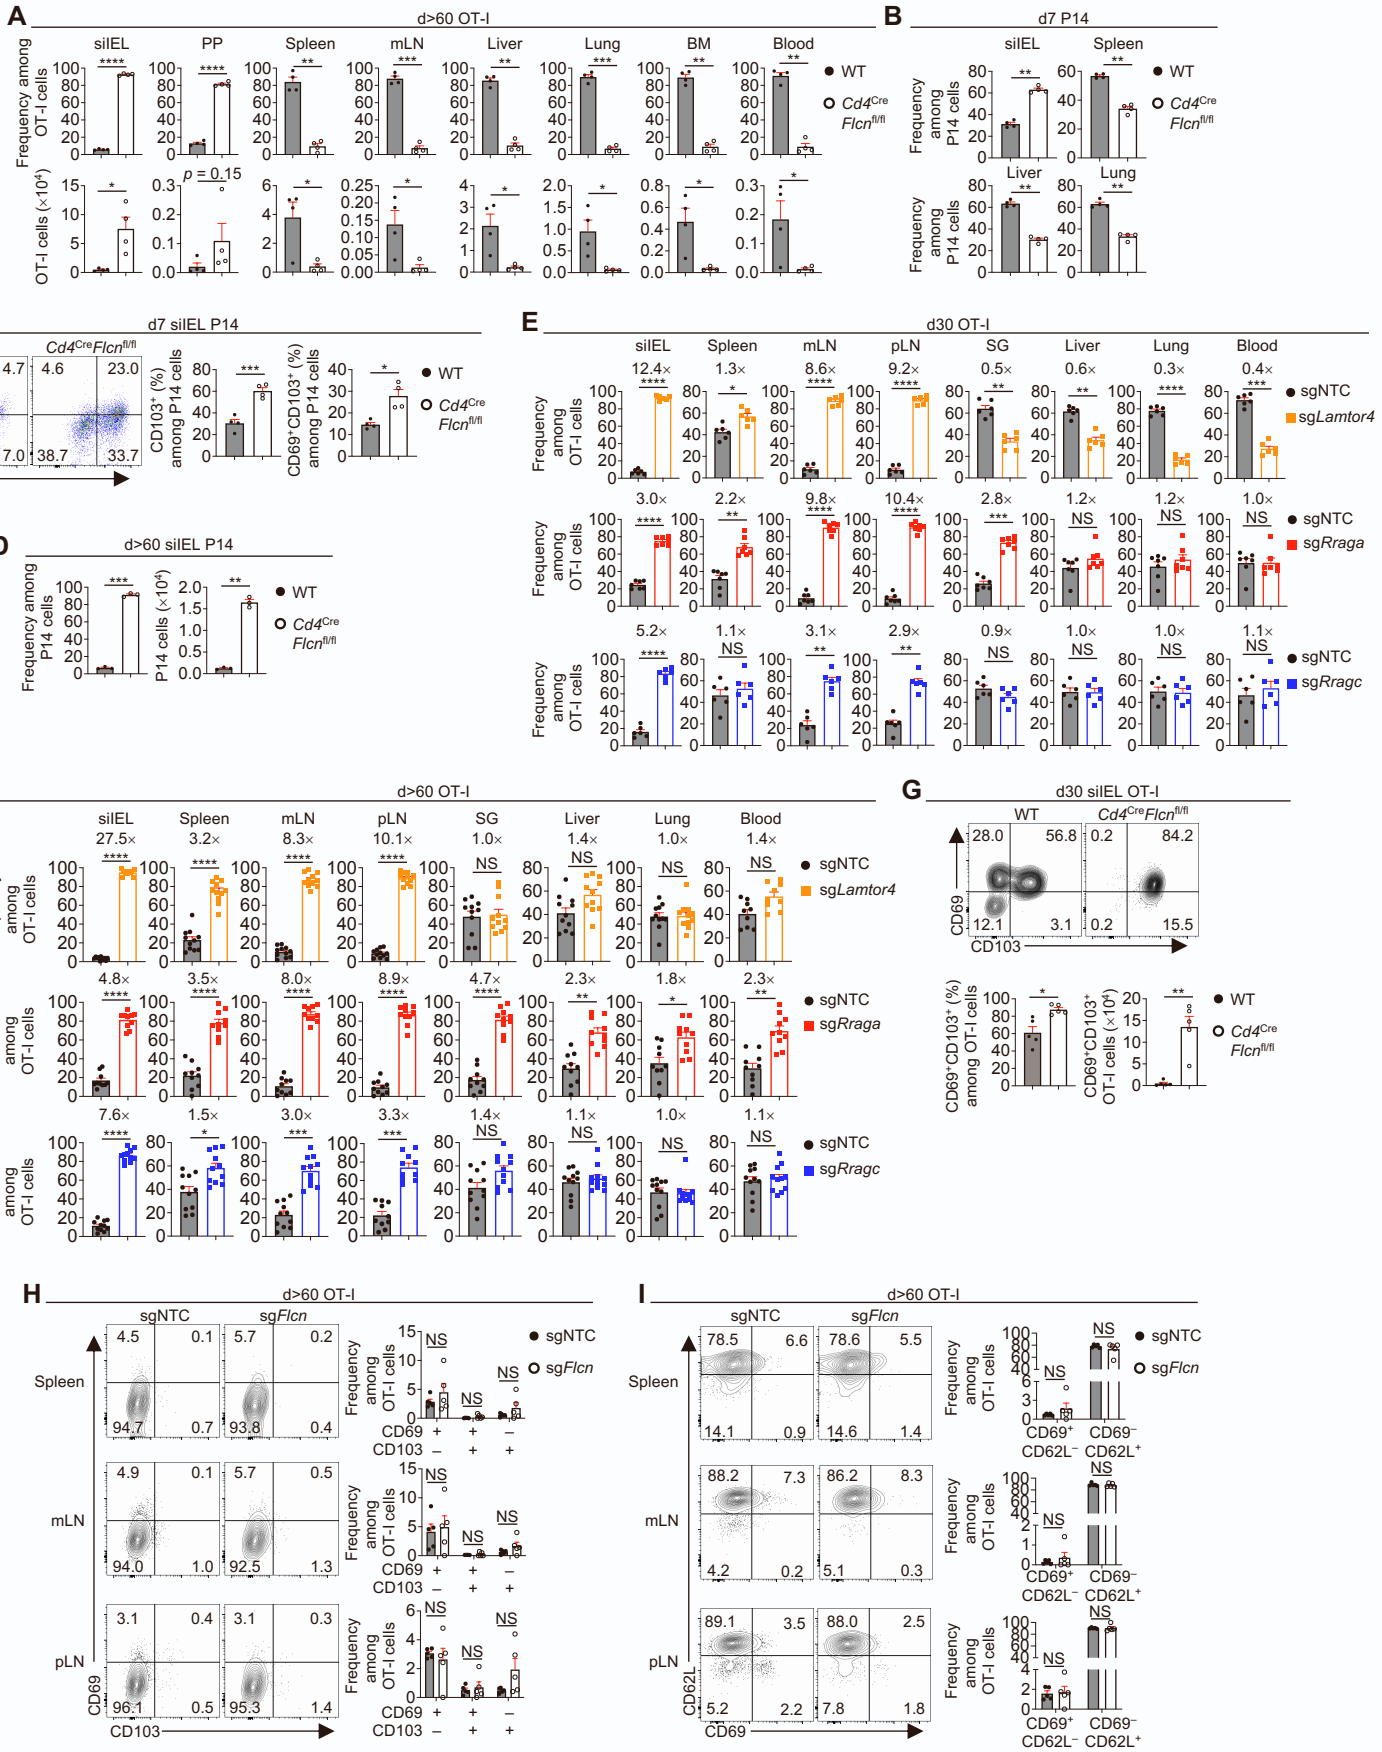

**Figure S2. Deletion of Flcn selects for CD8<sup>+</sup> T cell tissue residency in the small intestine (related to Figure 2).** (A) Naive WT (CD45.1<sup>+</sup>) and *Cd4<sup>Cre</sup>Flcn<sup>fl/fl</sup>* (CD45.1<sup>+</sup>CD45.2<sup>+</sup>) OT-I cells were co-transferred into WT (CD45.2<sup>+</sup>) mice at a 1:1 ratio, followed by infection with LM-OVA. Frequencies and numbers of OT-I cells in the indicated tissues at day >60 p.i. In blood, cell numbers are relative to 10<sup>6</sup> peripheral blood mononuclear cells (*n* = 4 per group). (B–D) Naive WT (CD45.2<sup>+</sup>Thy1.1<sup>+</sup>Thy1.2<sup>+</sup>) and *Cd4<sup>Cre</sup>Flcn<sup>fl/fl</sup>* (CD45.2<sup>+</sup>Thy1.2<sup>+</sup>) P14 cells were co-transferred into WT (CD45.1<sup>+</sup>) mice at a 1:1 ratio, followed by LCMV-Armstrong infection one day later. Frequencies among P14 cells in indicated tissues at day 7 p.i. (*n* = 4 per group) (B). Frequencies of CD103<sup>+</sup> or CD69<sup>+</sup>CD103<sup>+</sup> siEL P14 cells at day 7 p.i. (*n* = 4 per group) (C). Frequencies and numbers of P14 cells at day >60 p.i. (*n* = 3 per group) (D). (E and F) Frequencies among indicated sgRNA-transduced OT-I cells in indicated tissues at days 30 (E) or >60 (F) p.i. (from dual-color transfer system) (*n* ≥ 6 per group). Fold-change relative to sgNTC is indicated. (G) Frequencies and numbers of CD69<sup>+</sup>CD103<sup>+</sup> siEL OT-I cells at day 30 p.i. (from mice as described in A) (*n* = 5 per group). (H and I) Frequencies of indicated sgRNA-transduced CD69<sup>+</sup>CD103<sup>-</sup>, CD69<sup>+</sup>CD103<sup>+</sup>, and CD69<sup>-</sup>CD103<sup>+</sup> OT-I cells (H) or CD69<sup>+</sup>CD62L<sup>-</sup> and CD69<sup>-</sup>CD62L<sup>+</sup> OT-I cells (I) in indicated tissues at day >60 p.i. (from dual-color transfer system) (*n* = 5 per group). Two-tailed paired Student's t test (A–I). NS, not significant; \**p* < 0.05, \*\**p* < 0.01, \*\*\**p* < 0.001, \*\*\*\**p* < 0.0001. Data (mean ± SEM) are compiled from three (F) or represent ≥2 (A–E and G–I) experiments.

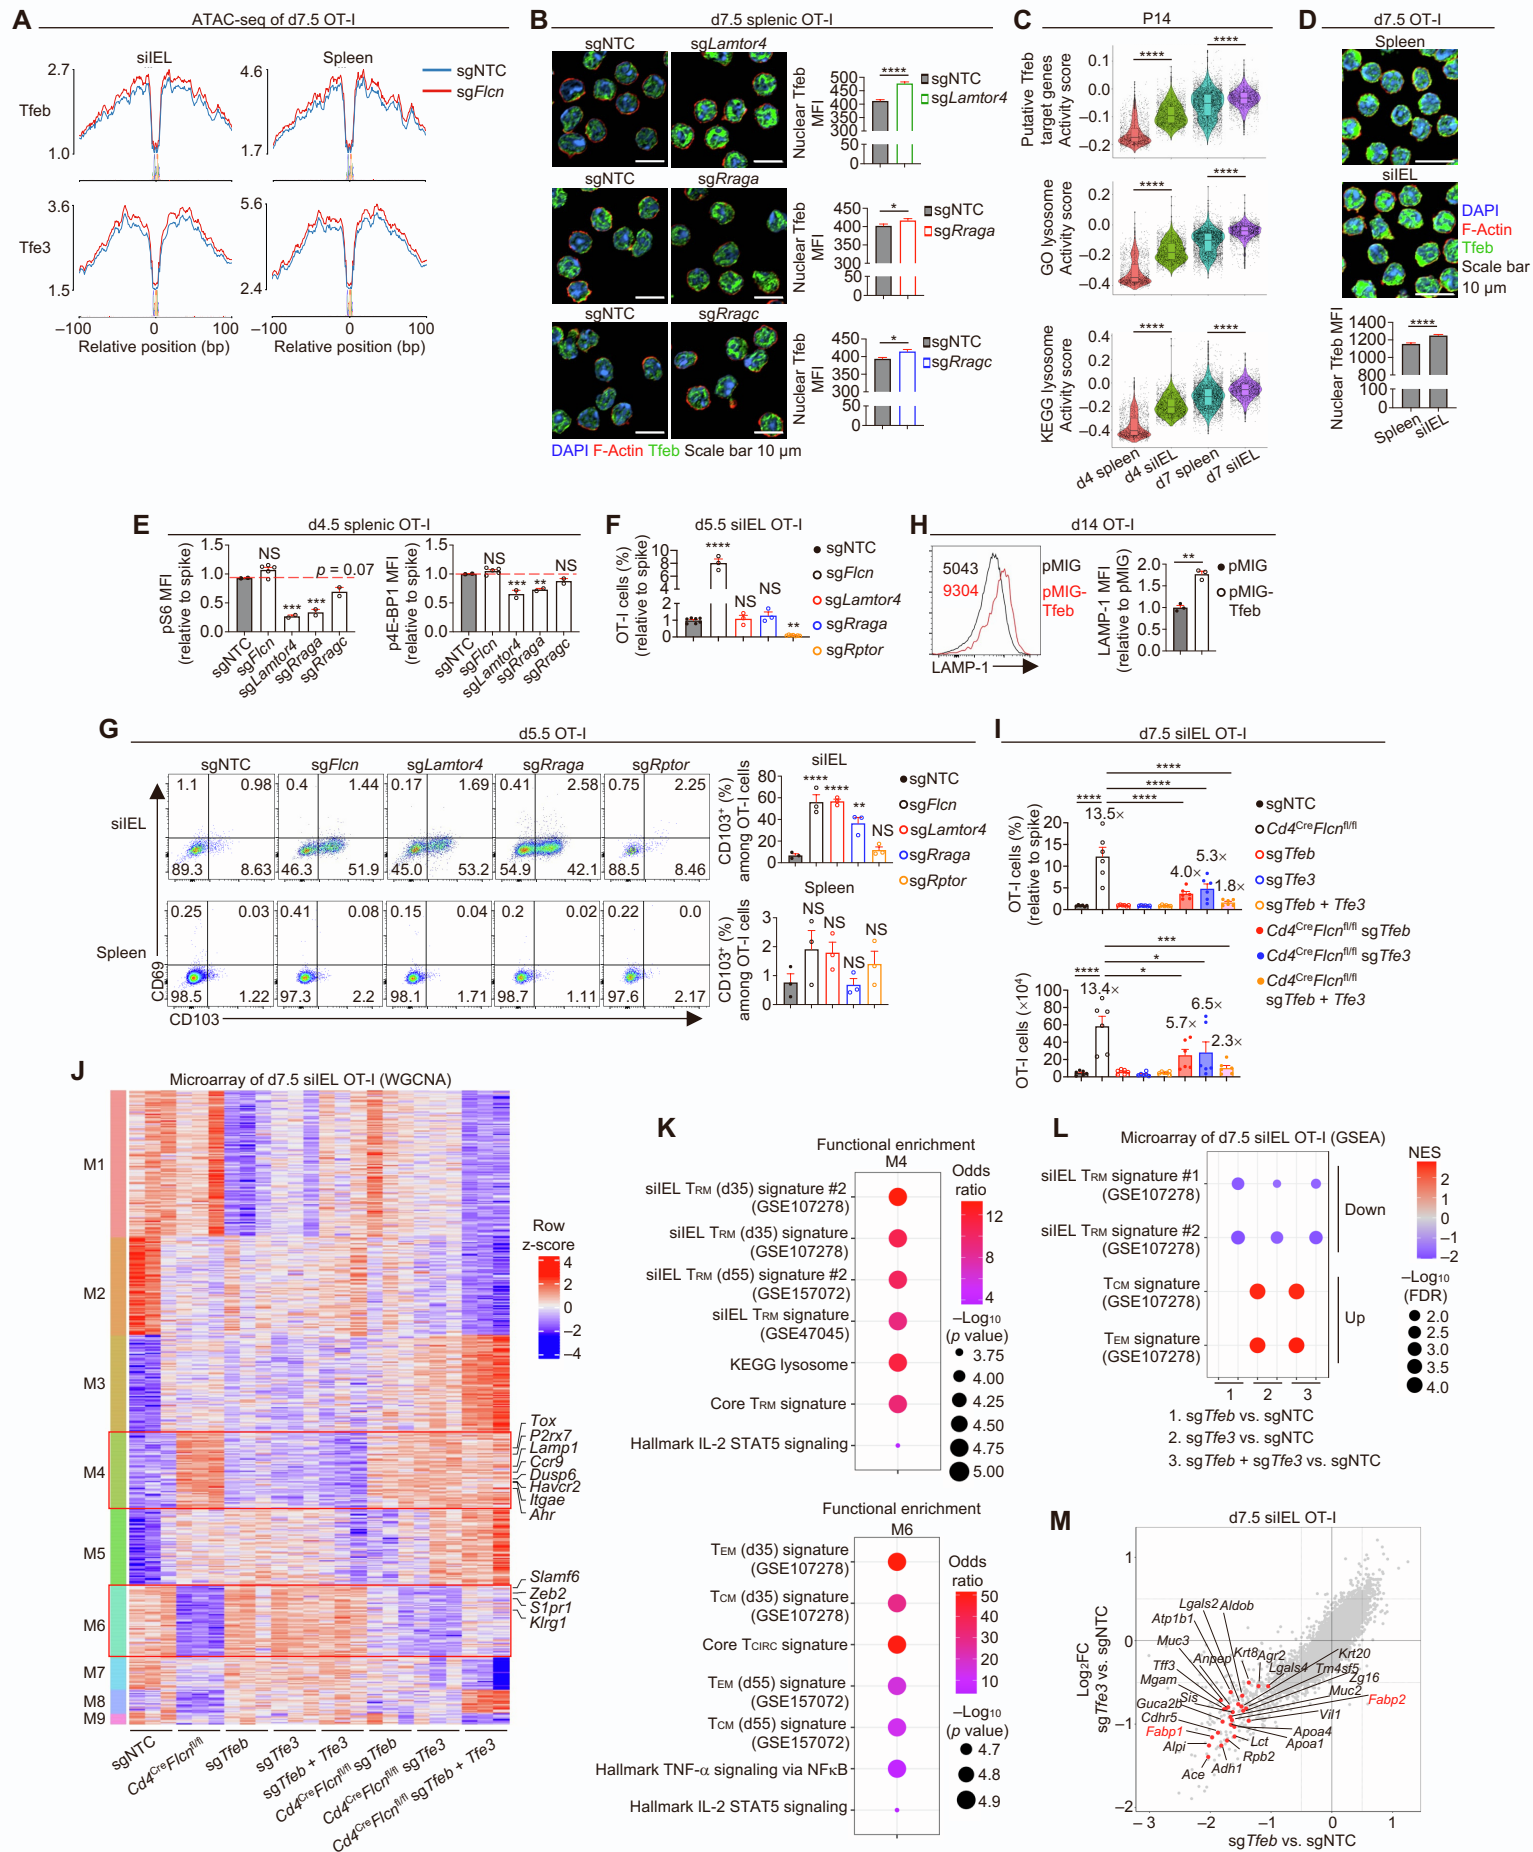

**Figure S3. Regulation and function of Tfeb and Tfe3 activities and mTORC1 signaling in T<sub>RM</sub> formation (related to Figure 3).** (A) Footprinting analysis of ATAC-seq data from sgNTC- or sg*Fln*-transduced OT-I cells from siEL and spleen at day 7.5 p.i. (as described in Figure 3A). (B) Nuclear Tfeb levels (based on MFI) in indicated sgRNA-transduced OT-I cells from spleen at day 7.5 p.i. (from dual-color transfer system) ( $n \geq 131$  cells per group). (C) Violin plots showing the activity scores of Tfeb putative target genes (see STAR Methods) or GO lysosome and KEGG lysosome gene signatures in P14 cells from indicated tissues profiled by scRNA-seq at days 4 and 7 p.i. (GSE131847; see STAR Methods). (D) Nuclear Tfeb levels (based on MFI) in OT-I cells from spleen or siEL at day 7.5 p.i. ( $n \geq 385$  per group cells). (E) Quantification (relative to spike; based on MFI) of phosphorylated S6 and 4E-BP1 (pS6 and p4E-BP1) in indicated sgRNA-transduced OT-I cells from spleen at day 4.5 p.i. (from dual-color transfer system) ( $n \geq 2$  per group). (F) Frequency (relative to spike) of indicated sgRNA-transduced OT-I cells in siEL at day 5.5 p.i. (from dual-color transfer system) ( $n \geq 3$  per group). (G) Flow cytometry analysis of CD69 and CD103 expression on OT-I cells transduced with indicated sgRNAs in siEL or spleen at day 5.5 p.i. (left). Right, frequency of CD103<sup>+</sup> OT-I cells transduced with indicated sgRNAs in siEL or spleen at day 5.5 p.i. ( $n = 3$  per group). (H) Intracellular LAMP-1 expression (relative to the average of the pMIG group; based on MFI) in pMIG (mCherry<sup>+</sup>) or pMIG-Tfeb (GFP<sup>+</sup>)-transduced OT-I cells from spleen at day 14 p.i. (from dual-color transfer system) ( $n = 3$  per group). (I) WT (from *Fln*<sup>fl/fl</sup>Cas9<sup>+</sup> mice) or *Fln*-deficient (from *Cd4*<sup>Cre</sup>*Fln*<sup>fl/fl</sup>Cas9<sup>+</sup> mice) OT-I cells were transduced or co-transduced with indicated sgRNAs (Ametrine<sup>+</sup> or GFP<sup>+</sup>), and then co-transferred at a 1:1 ratio with OT-I cells transduced with sgNTC (spike; Ametrine<sup>+</sup> or GFP<sup>+</sup>) followed by LM-OVA infection (from dual-color transfer system). Frequency (relative to spike) and number of indicated sgRNA-transduced OT-I cells in siEL at day 7.5 p.i. is shown. Fold-change relative to sgNTC is indicated ( $n = 6$  per group). (J) Heatmap depicting gene expression patterns in the nine gene modules (M1–M9) identified by transcriptome profiling and WGCNA of indicated sgRNA-transduced OT-I cells (as described in I) in siEL at day 7.5 p.i. ( $n = 3$  per group). (K) Functional enrichment analysis of the M4 and M6 genes (defined in J) using the KEGG and Hallmark signatures, curated T<sub>RM</sub>, T<sub>EM</sub>, and T<sub>CM</sub> signatures (GSE107278, GSE157072, GSE47045; see STAR Methods), and core T<sub>RM</sub> and T<sub>CIRC</sub> signatures (see STAR Methods). (L and M) OT-I cells transduced with indicated sgRNAs in siEL at day 7.5 p.i. were profiled for transcriptome analysis (as described in J). GSEA using curated siEL T<sub>RM</sub>, splenic T<sub>CM</sub> and splenic T<sub>EM</sub> gene signatures (GSE107278; see STAR Methods) was performed. Bubble plot showing enriched (red) and reduced (blue) gene signatures for the indicated comparisons (L). FC/FC plot of the indicated pairwise comparisons. Shared reduced genes in sg*Tfeb*- versus sgNTC-transduced OT-I cells compared with sg*Tfe3*- versus sgNTC-transduced OT-I cells (based on  $\log_2FC < -0.5$ ) in the curated siEL T<sub>RM</sub> gene signatures #1 and #2 (GSE107278; see STAR Methods) were highlighted in red (M). Two-tailed paired Student's t test (B and H), two-tailed unpaired Student's t test (D), one-way ANOVA (E–G and I), Wilcoxon rank sum test (C), or Fisher's exact test (K). NS, not significant; \* $p < 0.05$ , \*\* $p < 0.01$ , \*\*\* $p < 0.001$ , \*\*\*\* $p < 0.0001$ . Data (mean  $\pm$  SEM) are compiled from two (E, F, and I) or represent  $\geq 2$  (B, D, G, and H) experiments.

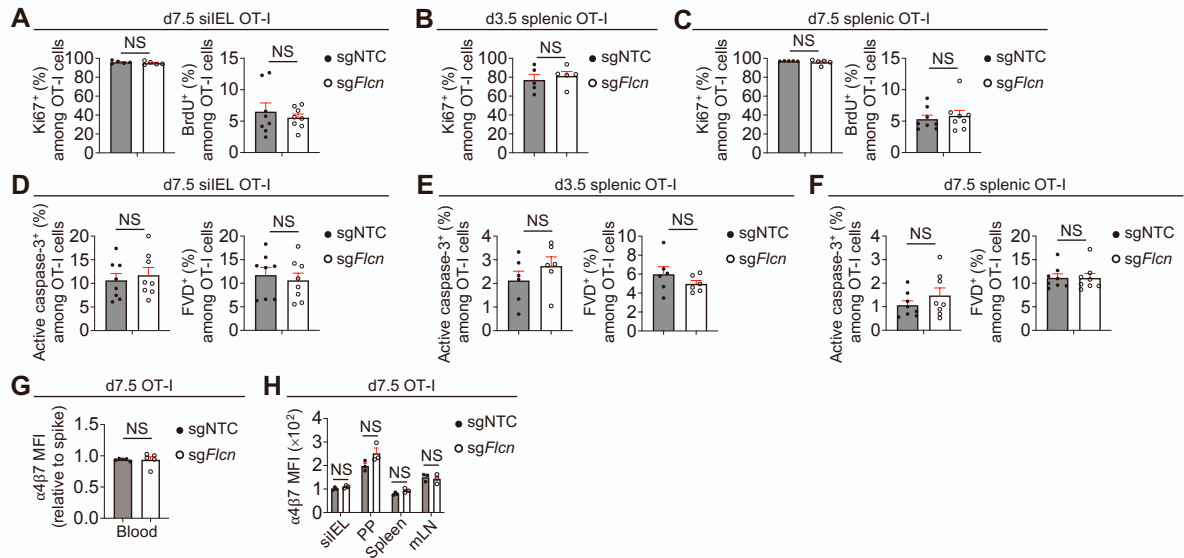

**Figure S4. Flcn deficiency does not impair CD8<sup>+</sup> T cell proliferation or survival (related to Figure 4).** (A) Frequencies of Ki67<sup>+</sup> and bromodeoxyuridine (BrdU)<sup>+</sup> cells among sgNTC- and sgFlcn-transduced OT-I cells in siIEL at day 7.5 p.i. (from dual-color transfer) ( $n \geq 5$  per group). (B) Frequency of Ki67<sup>+</sup> cells among sgNTC- and sgFlcn-transduced OT-I cells in spleen at day 3.5 p.i. ( $n = 5$  per group). (C) Frequencies of Ki67<sup>+</sup> and BrdU<sup>+</sup> cells among sgNTC- and sgFlcn-transduced OT-I cells in spleen at day 7.5 p.i. ( $n \geq 5$  per group). (D) Frequencies of active caspase-3<sup>+</sup> and fixable viability dye (FVD)<sup>+</sup> cells among sgNTC- and sgFlcn-transduced OT-I cells in siIEL at day 7.5 p.i. ( $n \geq 5$  per group). (E) Frequencies of active caspase-3<sup>+</sup> and FVD<sup>+</sup> cells among sgNTC- and sgFlcn-transduced OT-I cells in spleen at day 3.5 p.i. ( $n \geq 5$  per group). (F) Frequencies of active caspase-3<sup>+</sup> and FVD<sup>+</sup> cells among sgNTC- and sgFlcn-transduced OT-I cells in spleen at day 7.5 p.i. ( $n \geq 5$  per group). (G)  $\alpha 4\beta 7$  expression (relative to spike; based on MFI) on sgNTC- and sgFlcn-transduced OT-I cells in the blood at day 7.5 p.i. (from dual-color transfer system) ( $n = 5$  per group). (H)  $\alpha 4\beta 7$  expression (based on MFI) on sgNTC- and sgFlcn-transduced OT-I cells from indicated tissues at day 7.5 p.i. ( $n = 3$  per group). Two-tailed paired Student's t test (A–F) or two-tailed unpaired Student's t test (G and H). NS, not significant. Data (mean  $\pm$  SEM) represent  $\geq 2$  experiments (A–H).

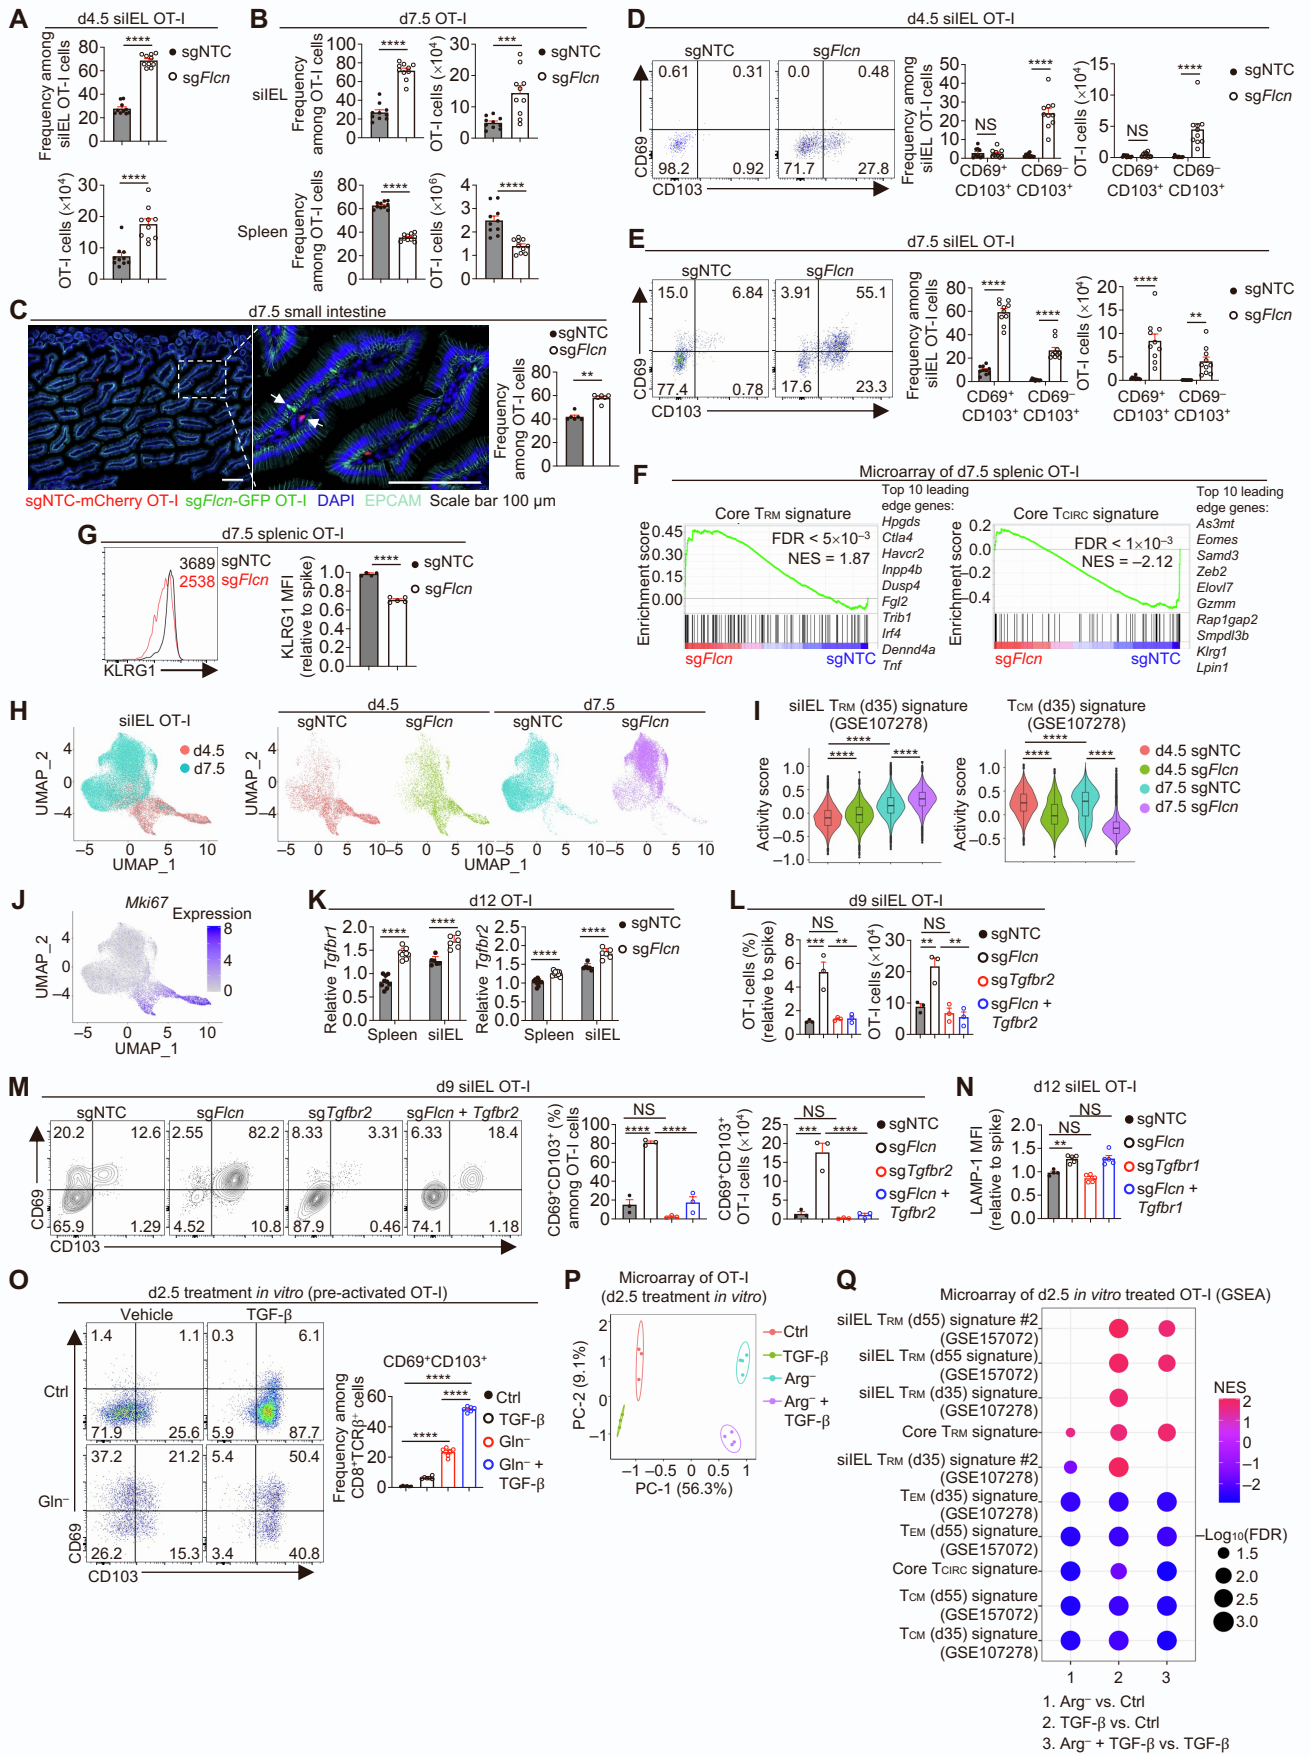



**Figure S5. Targeting Flcn promotes early accumulation and programming of siEL CD8<sup>+</sup> T<sub>RM</sub> cells (related to Figure 5).**

(A and B) Frequency and number of total OT-I cells transduced with indicated sgRNAs in siEL at day 4.5 p.i. (A) or in siEL or spleen at day 7.5 p.i. (B) ( $n = 10$  per group). (C) Confocal images and frequency of sgNTC (mCherry<sup>+</sup>)- and sg*Flcn* (GFP<sup>+</sup>)-transduced OT-I cells in the small intestine at day 7.5 p.i. (from dual-color transfer system). White arrows indicate representative sgNTC (red) and sg*Flcn* (green) OT-I cells ( $n = 3$ , with two imaging fields quantified per mouse). (D and E) Frequencies and numbers of sgNTC- or sg*Flcn*-transduced CD69<sup>+</sup>CD103<sup>+</sup> and CD69<sup>-</sup>CD103<sup>+</sup> siEL OT-I cells at day 4.5 (D) or 7.5 (E) p.i. ( $n = 10$  per group). (F) sgNTC (Ametrine<sup>+</sup>)- and sg*Flcn* (GFP<sup>+</sup>)-transduced total OT-I cells were sort-purified from the spleen of the same host on day 7.5 p.i. and profiled by microarray assay. GSEA enrichment plots of core T<sub>RM</sub> and T<sub>CIRC</sub> gene signatures (see STAR Methods) are shown. (G) KLRG1 expression (relative to spike; based on MFI) on indicated sgRNA-transduced OT-I cells in spleen at day 7.5 p.i. (from dual-color transfer system) ( $n = 5$  per group). (H–J) sgNTC (Ametrine<sup>+</sup>)- or sg*Flcn* (GFP<sup>+</sup>)-transduced OT-I cells from siEL of the same host were sort-purified at days 4.5 and 7.5 p.i. and profiled by scRNA-seq ( $n = 2$  biological replicates per time point, and each replicate was pooled from 2 mice). UMAP plot depicting all siEL OT-I cells and individual perturbations (H). Violin plots showing activity scores of curated siEL T<sub>RM</sub> signature or T<sub>CM</sub> signature (GSE107278; see STAR Methods) (I). UMAP plot depicting *Mki67* expression (J). (K) Relative *Tgfb1* and *Tgfb2* expression in sgNTC- or sg*Flcn*-transduced OT-I cells in spleen or siEL at day 12 p.i. ( $n \geq 6$  samples per group). (L and M) Frequencies (relative to spike) and numbers of indicated sgRNA-transduced total (L) or CD69<sup>+</sup>CD103<sup>+</sup> (M) OT-I cells in siEL at day 9 p.i. (from dual-color transfer system) ( $n = 3$  per group). (N) Intracellular LAMP-1 expression (relative to spike; based on MFI) in indicated sgRNA-transduced OT-I cells in siEL at day 12 p.i. (from dual-color transfer system) ( $n \geq 4$  per group). (O) Frequency of CD69<sup>+</sup>CD103<sup>+</sup> OT-I cells after naive OT-I cells were cultured *in vitro* with anti-CD3 and anti-CD28 for 48 h, expanded in rhIL-2, rmlL-15, and rmlL-7 for 24 h, and then transferred into Ctrl or Gln<sup>-</sup> RPMI medium supplemented with the above cytokines with or without rhTGF- $\beta$ 1 for 2.5 days ( $n = 6$  technical replicates per group). (P and Q) OT-I cells were cultured as indicated in (O), followed by transcriptome profiling. Principal component analysis of the transcriptomes of the indicated groups is shown (P). Bubble plot showing the enriched (red) and reduced (blue) signatures in each of the indicated comparisons, based on GSEA using core T<sub>RM</sub> and T<sub>CIRC</sub> signatures (see STAR Methods), and curated T<sub>RM</sub>, T<sub>EM</sub>, and T<sub>CM</sub> signatures (GSE107278 and GSE157072; see STAR Methods) (Q). Two-tailed paired Student's t test (A–C), two-way ANOVA (D, E, and K), two-tailed unpaired Student's t test (G), one-way ANOVA (L–O), or Wilcoxon rank sum test (I). NS, not significant; \*\* $p < 0.01$ , \*\*\* $p < 0.001$ , \*\*\*\* $p < 0.0001$ . Data (mean  $\pm$  SEM) represent  $\geq 3$  (A, B, D, E, G, L, M, and O) or one (C, K, and N) experiments.

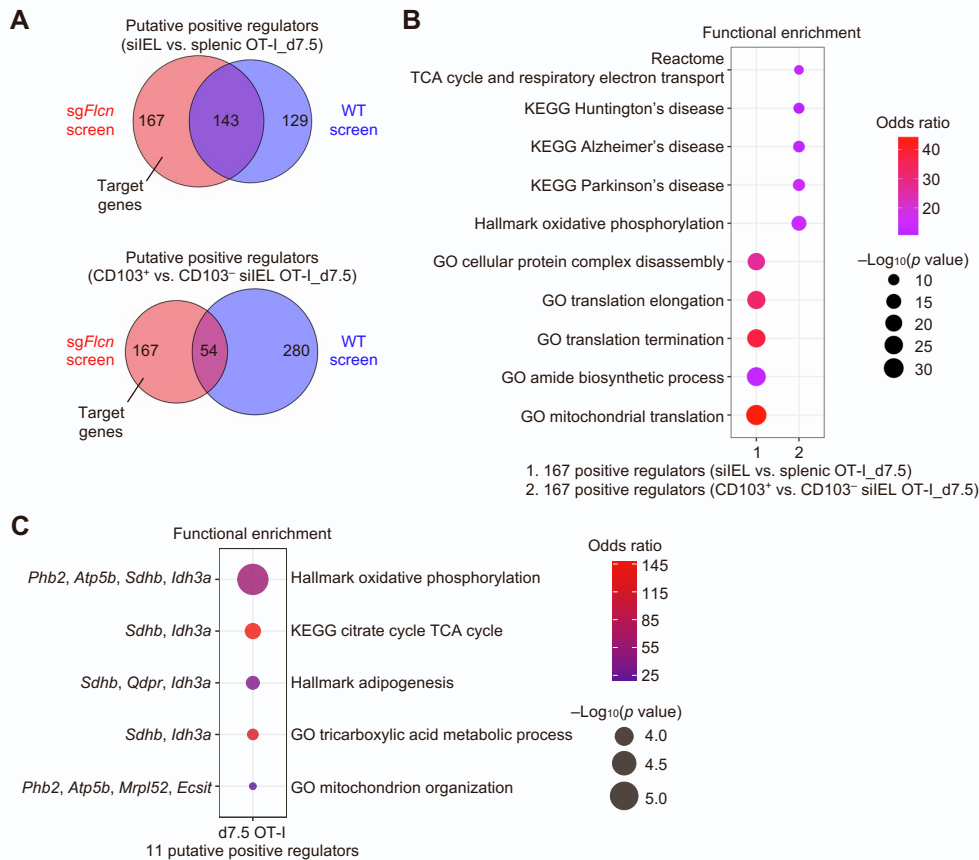

**Figure S6. Genetic interaction screen identifies putative positive regulators of Flcn-deficient siEL OT-I and CD103<sup>+</sup> OT-I cell accumulation (related to Figure 6).** (A) Venn diagrams depicting the putative positive regulators identified from the *in vivo* CRISPR screen of *sgFlcn*-transduced OT-I cells (described in Figure 6A) and the *in vivo* CRISPR screen of WT OT-I cells (described in Figure 1A). The discrete and overlapping perturbation effects were compared in day 7.5 siEL OT-I cells (day 7.5 siEL OT-I cells versus day 7.5 splenic OT-I cells) and day 7.5 siEL CD103<sup>+</sup> OT-I cells (day 7.5 siEL CD103<sup>+</sup> OT-I cells versus day 7.5 siEL CD103<sup>-</sup> OT-I cells) (see STAR Methods). (B) Functional enrichment analysis of the target genes defined in (A) using the Reactome, KEGG, Hallmark, and GO signatures. Bubble plot showing the top 5 enriched pathways in each of the indicated putative positive regulators. (C) Functional enrichment analysis of the 11 genes defined in Figure 6F using the KEGG, Hallmark, and GO signatures. Fisher's exact test (B and C).
